# Supplementary material for: A three-dimensional network structure of metal-based nanozymes for the construction of colorimetric sensors for the detection of antioxidants
Source: Royal Society of Chemistry journal article supplement (doi:10.1039/d3ay02199h), 2024-01-01
Supplement: d3ay02199h1.pdf [file d3ay02199h1.pdf]

## Supporting information

### **Three-dimensional network structure of metal-based nanozymes for the construction of colorimetric sensors for the detection of antioxidants**

Shuo Qin,<sup>1#</sup> Bin Liu,<sup>1#</sup> Yuting Xue,<sup>1</sup> Ruixue Zhao,<sup>1</sup> Guo Wang,<sup>1</sup> Kai Li,<sup>1</sup> Lirong  
Zheng,<sup>2</sup> Pingyang Wang,<sup>1</sup> Tianhao Tang,<sup>1</sup> Yue Yang,<sup>1</sup> Zhengbo Chen,<sup>1\*</sup>, Xia Zuo.<sup>1\*</sup>

<sup>1</sup>Department of Chemistry, Capital Normal University, Beijing, 100048, China

<sup>2</sup> Institute of High Energy Physics, Chinese Academy of Sciences, Beijing 100049,  
China

E-mail: [czb979216@sina.com](mailto:czb979216@sina.com); [zuoxia@cnu.edu.cn](mailto:zuoxia@cnu.edu.cn)

<sup>#</sup>These authors contribute this work equally

**Materials and Reagents.** 4-nitrophthalonitrile (Ark pharm), 4-Hydroxybenzaldehyde (Alfa Aesar),  $\text{FeCl}_2 \cdot 4\text{H}_2\text{O}$ ,  $\text{CuAc}_2 \cdot \text{H}_2\text{O}$ ,  $\text{ZnAc}_2 \cdot 2\text{H}_2\text{O}$ , 1,8-diazabicyclo[5.4.0]undec-7-ene (Innochem), dimethylaminoethanol (Alfa Aesar), acetone, NaAc, chitosan (Sinopharm Chemical Reagent), graphene oxide powder (JCNO). 3,3',5,5'-tetramethylbenzidine (TMB), Glutathione (GSH), ascorbic acid (AA), cysteine (Cys), tannin (TA), catechin (C), dopamine (DA), uric acid (UA) were obtained from Sigma-Aldrich, Co-N-C (from laboratory),  $\text{H}_2\text{O}_2$ , Acetate buffer (HAc-NaAc) solutions (0.2 M) with different pH values were prepared by acetic acid and sodium acetate in distilled water.  $\text{K}_2\text{CO}_3$ , NaOH, N,N-dimethylformamide, absolute ethyl alcohol, and 36 % acetic acid were purchased from Beijing chemical reagent factory. All the chemicals were of analytical pure grade and used as received without further purification.

**Instrumentation.** The morphologies of the samples were characterized by scanning electron microscopy (SEM, Hitachi, Japan) and transmission electron microscopy (TEM, Hitachi, Japan). The high-resolution TEM (HRTEM) and elemental mappings were obtained from a scanning transmission electron microscope (STEM). The X-ray diffraction (XRD) pattern was performed on a D8 ADVANCE/Bruker diffractometer (Germany) employing the Cu  $K\alpha$  radiation source ( $\lambda = 0.1541 \text{ nm}$ ). X-ray photoelectron spectroscopy (XPS) (ESCALAB 250, UK) was monochromatic Al  $K\alpha$  radiation as the excitation source. Extended X-ray absorption fine structure (EXAFS)-constituted XAFS spectra were acquired at the Beijing Synchrotron Radiation Facility. The absorption spectra of Fe, Cu, Zn K-edge spectra were collected in the fluorescence mode using a double-crystal Si(111) monochromatic. Colorimetric absorbance was measured with UV-2700 spectrophotometer (Daojin, Japan).

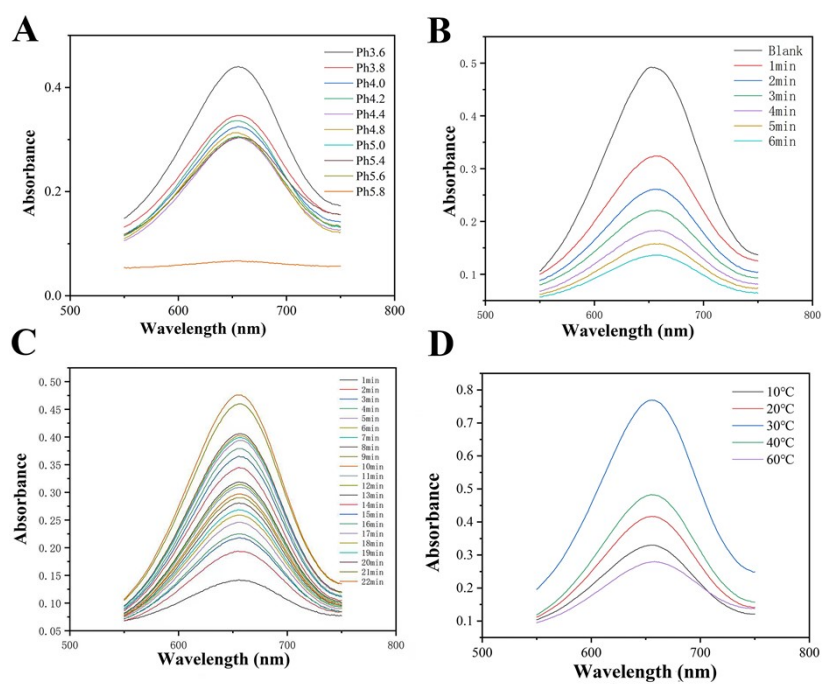

**Fig. S1.** UV-Vis absorption spectra of oxTMB under different conditions. (A)pH, (B) Antioxidant action time, (C) Reaction time, (D) Reaction temperature. Fe-based nanozyme.

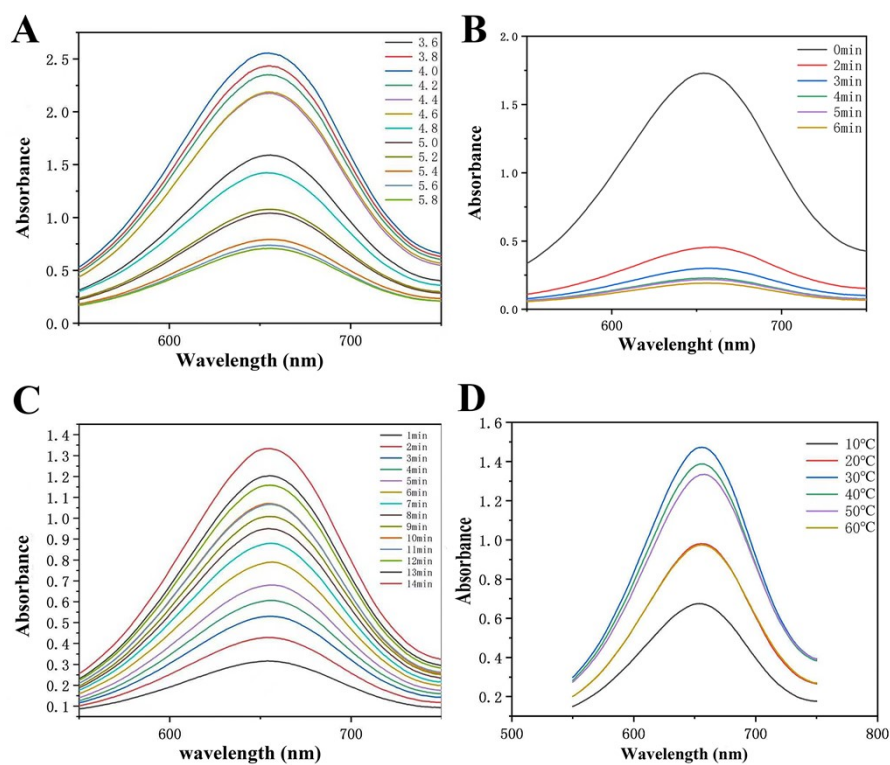

**Fig. S2.** UV-Vis absorption spectra of oxTMB under different conditions. (A) pH, (B) Antioxidant action time, (C) Reaction time, (D) Reaction temperature. Cu-based nanozyme.

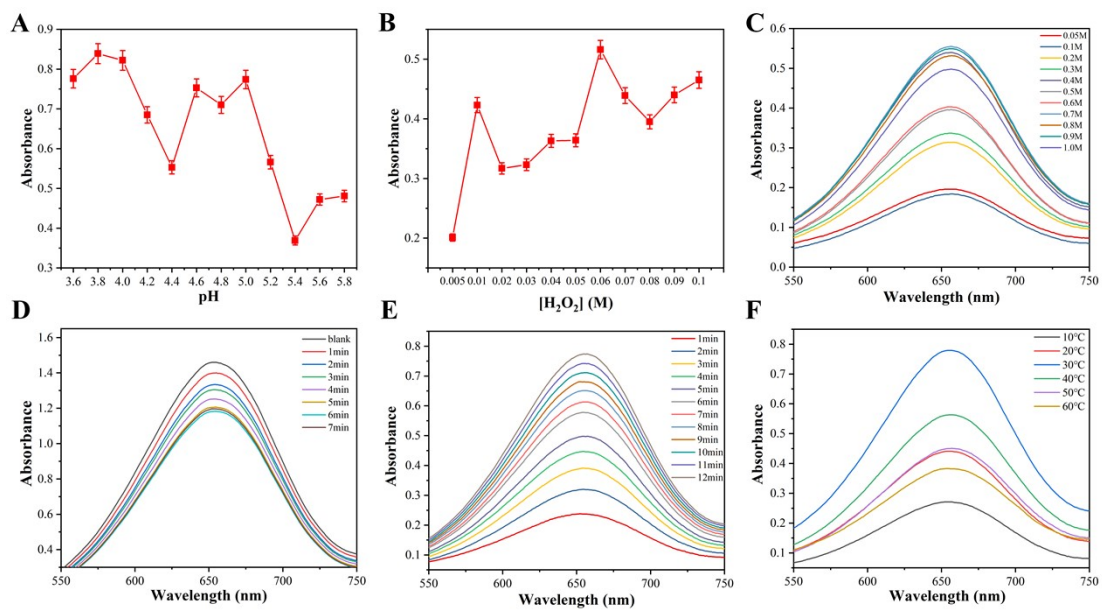

**Fig. S3.** UV-Vis absorption spectra of oxTMB under different conditions. (A)pH, (B) $H_2O_2$  concentration, (C)TMB concentration, (D) Antioxidant action time, (E) Reaction time, (F) Reaction temperature. Zn-based nanozyme.

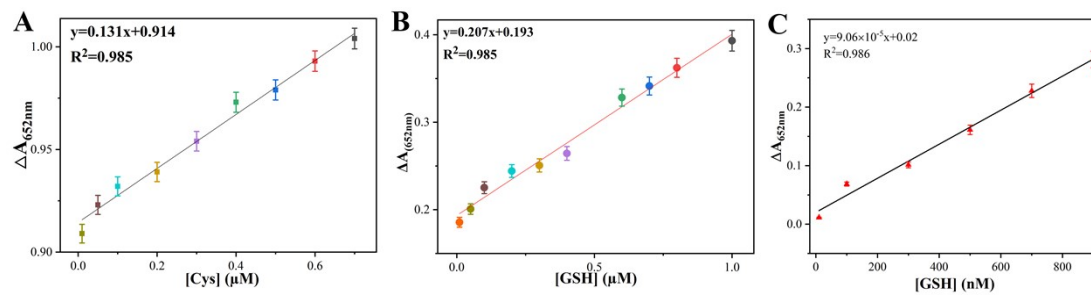

**Fig. S4.** The linear relationships of Cys and GSH in Cu-based nanozyme (A), Fe-based nanozyme (B), Zn-based nanozyme (C).

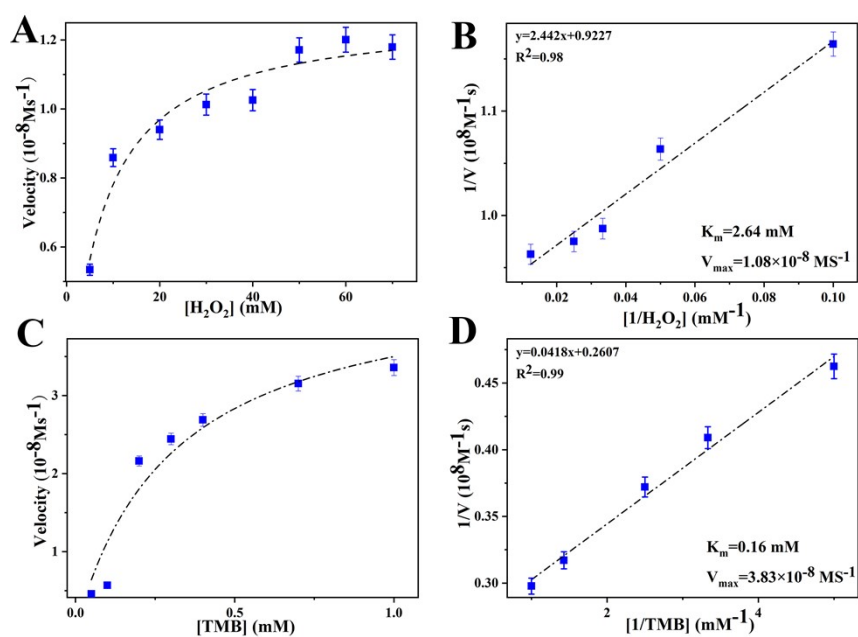

**Fig. S5.** (A) Reaction rate curve, (B) double reciprocal curve of reaction rate and substrate concentration of Co-based nanozyme, using  $\text{H}_2\text{O}_2$  as a substrate. (C) Reaction rate curve, (D) double reciprocal curve of reaction rate and substrate concentration of Co-based nanozyme. Using TMB as a substrate.

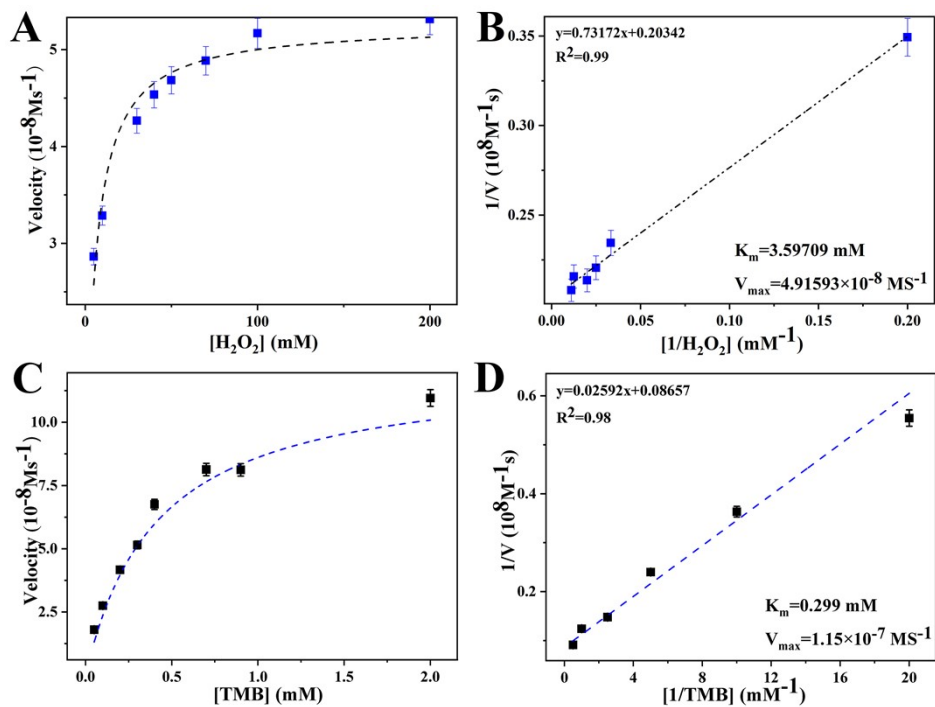

**Fig. S6.** (A) Reaction rate curve, (B) double reciprocal curve of reaction rate and substrate concentration of Cu-based nanozyme, using  $\text{H}_2\text{O}_2$  as a substrate. (C) Reaction rate curve, (D) double reciprocal curve of reaction rate and substrate concentration of Cu-based nanozyme. Using TMB as a substrate.



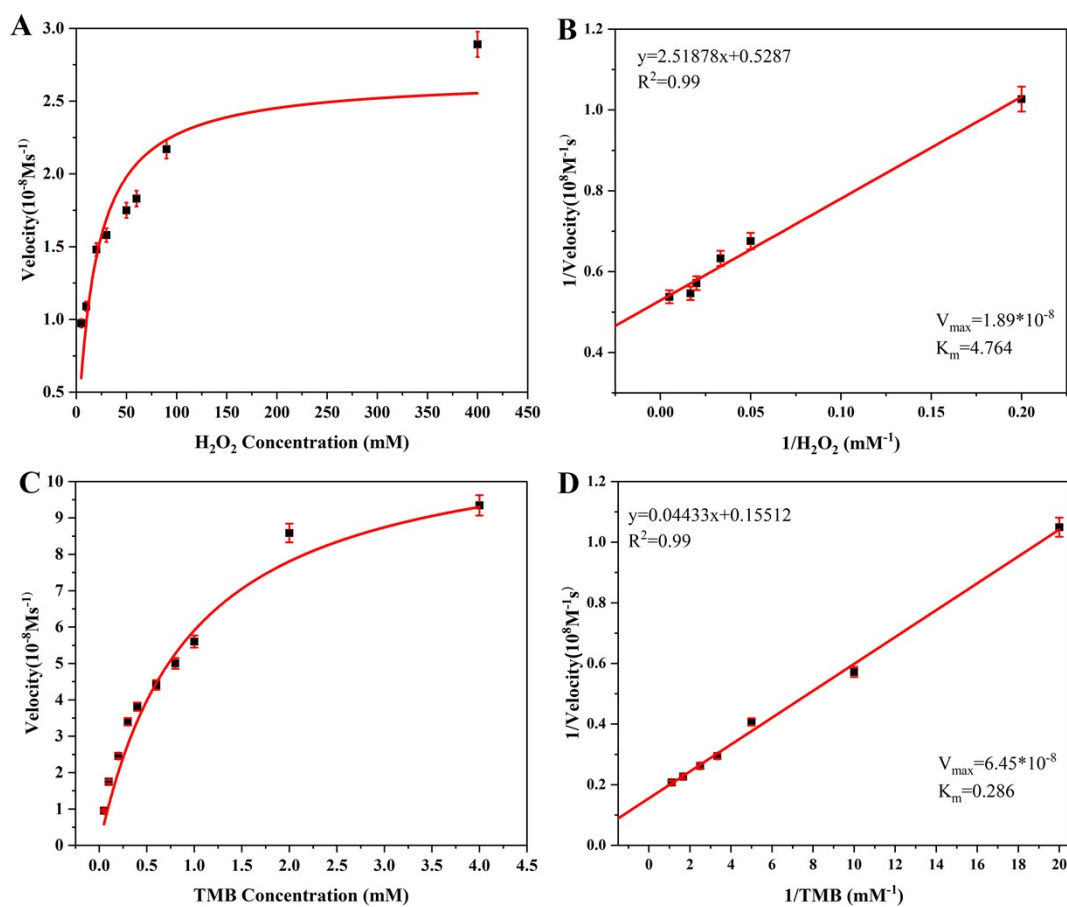

**Fig. S7.** (A) Reaction rate curve, (B) double reciprocal curve of reaction rate and substrate concentration of Fe-based nanozyme, using  $\text{H}_2\text{O}_2$  as a substrate. (C) Reaction rate curve, (D) double reciprocal curve of reaction rate and substrate concentration of Fe-based nanozyme. Using TMB as a substrate.

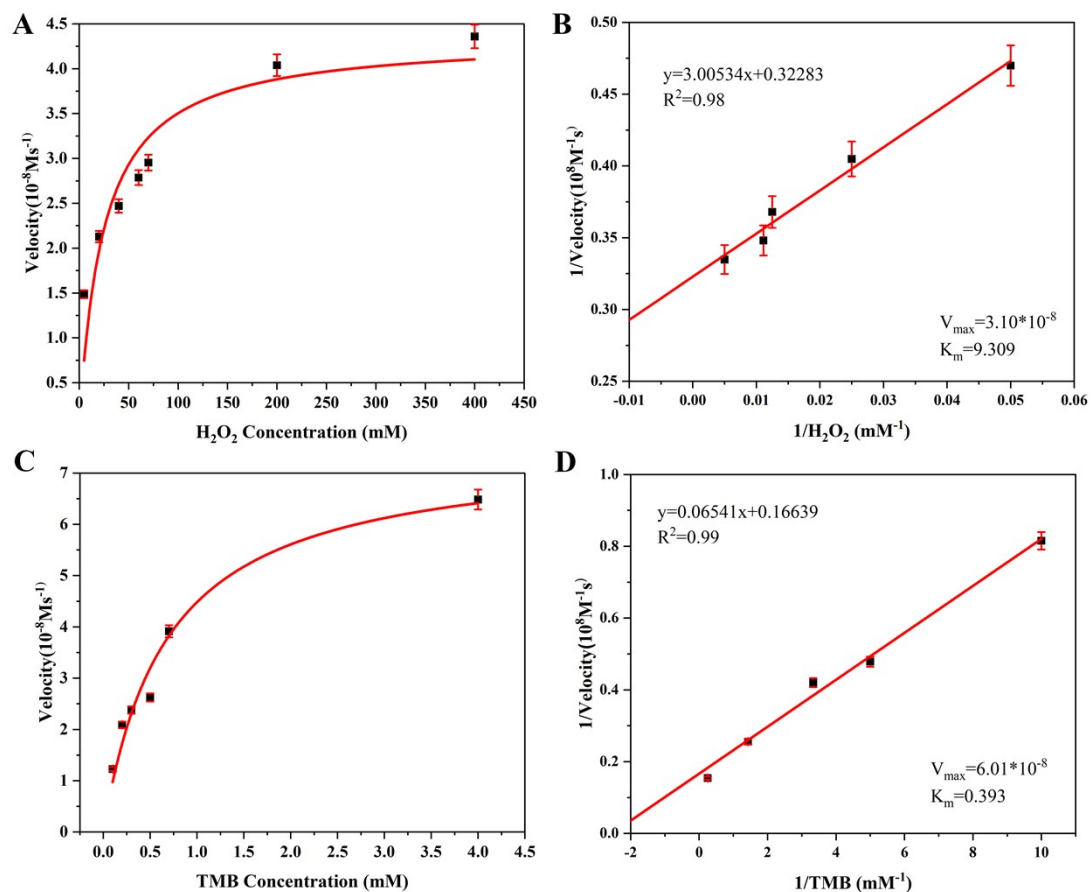

**Fig. S8.** (A) Reaction rate curve, (B) double reciprocal curve of reaction rate and substrate concentration of Zn-based nanozyme, using  $\text{H}_2\text{O}_2$  as a substrate. (C) Reaction rate curve, (D) double reciprocal curve of reaction rate and substrate concentration of Zn-based nanozyme. Using TMB as a substrate.

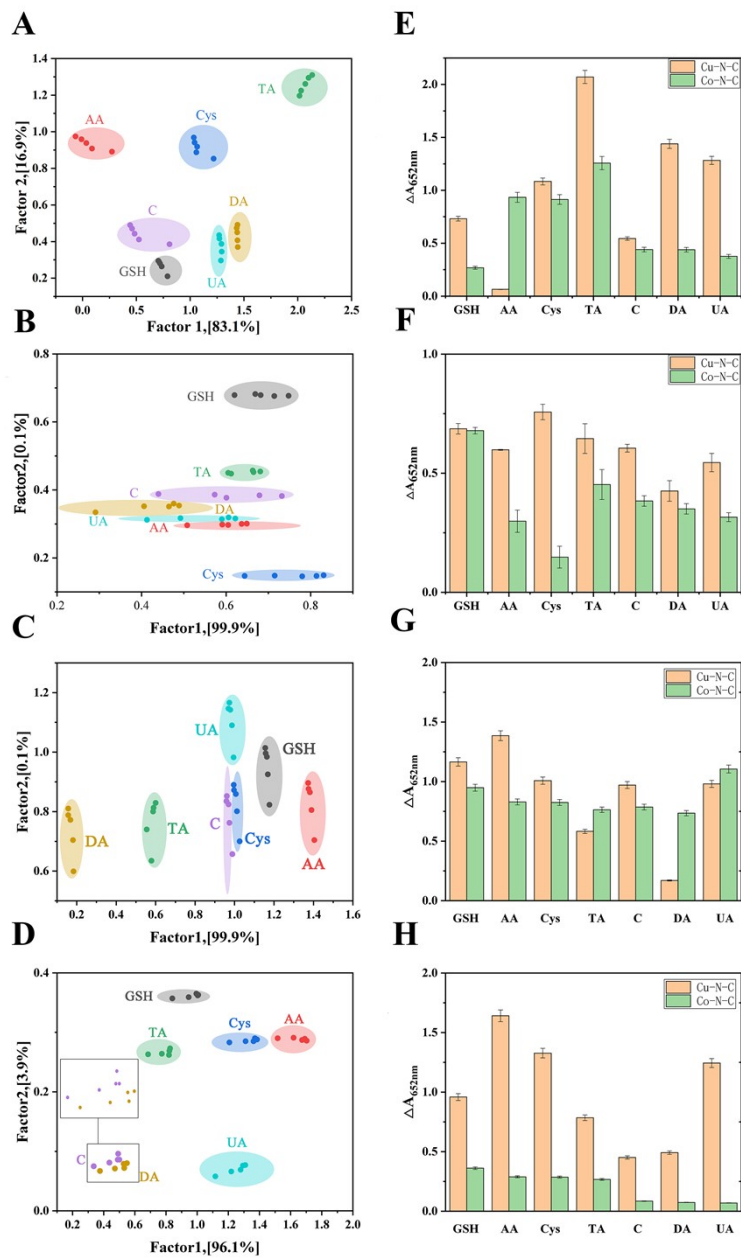

**Fig. S9.** (A-D)LDA Canonical score plot, (E-H) Fingerprints.(A, E)50 $\mu$ M , (B, F) 1 $\mu$ M , (C, G) 100nM , (D, H) 10nM. Cu-based nanozyme, Co-based nanozyme sensor array.

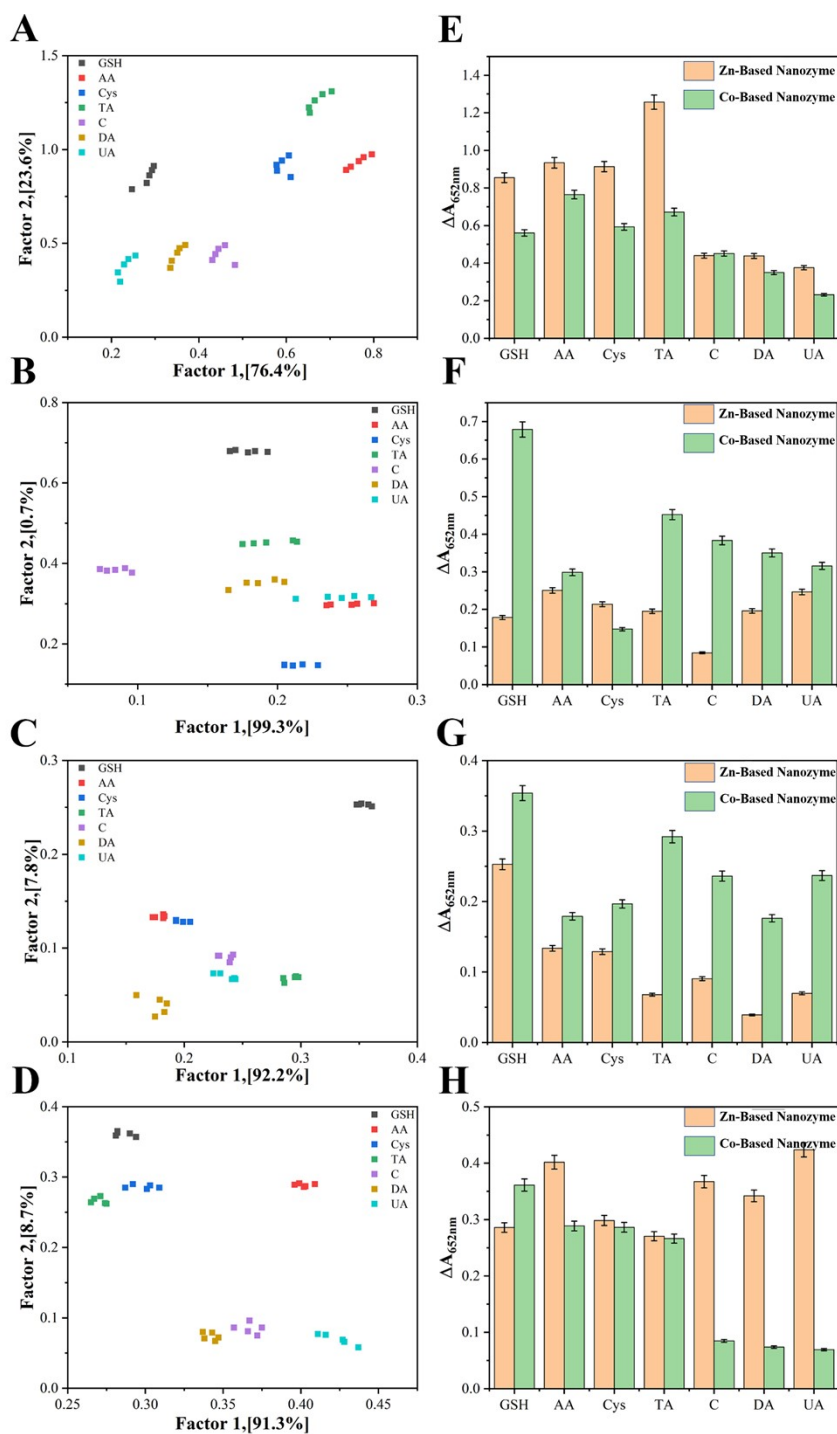

**Fig. S10.** (A-D)LDA Canonical score plot, (E-H) Fingerprints.(A, E)50 $\mu$ M , (B, F) 1 $\mu$ M , (C, G) 100nM , (D, H) 10nM. Zn-based nanozyme, Co-based nanozyme sensor array.

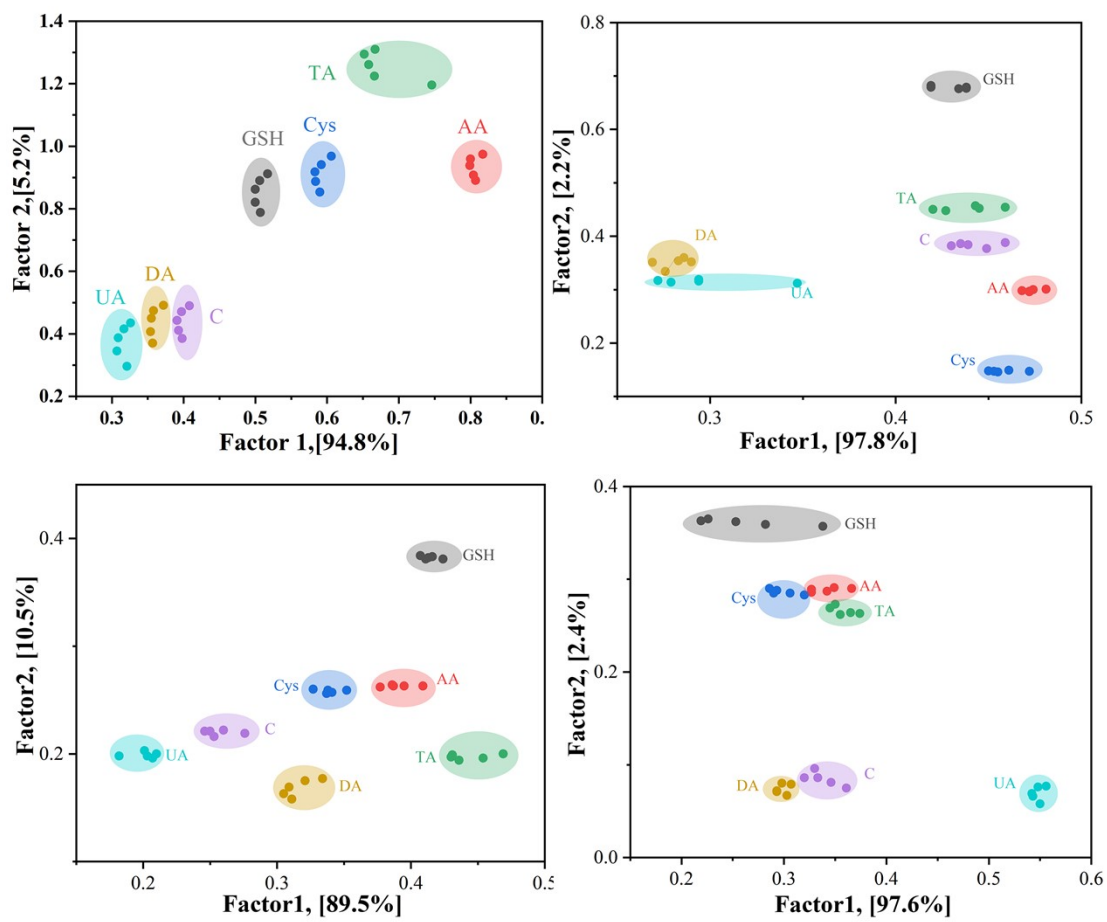

**Fig. S11.** LDA Canonical score plots for 50  $\mu$ M, 1  $\mu$ M, 100 nM, 10 nM antioxidants. Fe-based nanozyme, Co-based nanozyme sensor array.

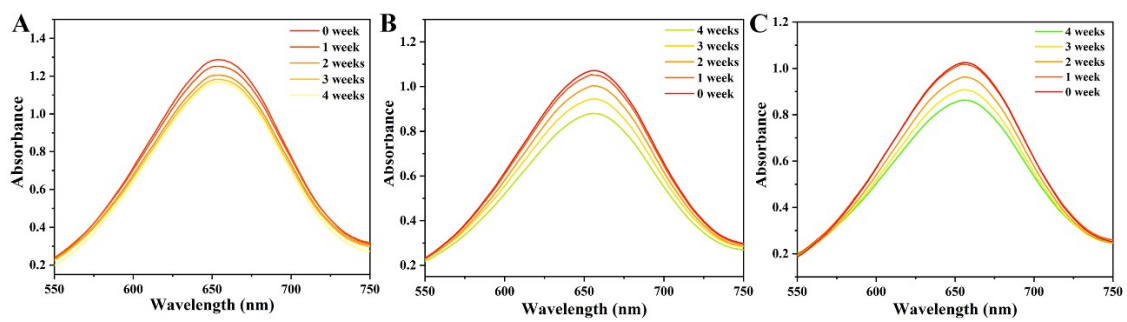

**Fig. S12.** Nanozyme activity with different storage times, (A) Fe-based nanozyme, (B) Cu-based nanozyme, (C) Zn-based nanozyme.

Table S0. Comparison of steady-state kinetic parameters ( $K_m$  and  $V_{max}$ ) between Metal-based nanozymes and other materials.

| <b>Materials</b>                       | <b>TMB</b>                       |              | <b>H<sub>2</sub>O<sub>2</sub></b> |              | <b>Reference</b> |
|----------------------------------------|----------------------------------|--------------|-----------------------------------|--------------|------------------|
|                                        | $V_{max}(10^{-8}M \cdot S^{-1})$ | $K_m(mM)$    | $V_{max}(10^{-8}M \cdot S^{-1})$  | $K_m(mM)$    |                  |
| <b>Co-based nanozyme</b>               | <b>3.83</b>                      | <b>0.160</b> | <b>1.08</b>                       | <b>2.64</b>  | <b>This work</b> |
| <b>Fe-based nanozyme</b>               | <b>6.45</b>                      | <b>0.286</b> | <b>1.89</b>                       | <b>4.76</b>  | <b>This work</b> |
| <b>Cu-based nanozyme</b>               | <b>11.5</b>                      | <b>0.299</b> | <b>4.92</b>                       | <b>3.59</b>  | <b>This work</b> |
| <b>Zn-based nanozyme</b>               | <b>6.01</b>                      | <b>0.393</b> | <b>3.10</b>                       | <b>9.31</b>  | <b>This work</b> |
| <b>CuNCs</b>                           | <b>7.20</b>                      | <b>1.125</b> | <b>16.80</b>                      | <b>2.52</b>  | <b>[1]</b>       |
| <b>Fe<sub>3</sub>O<sub>4</sub> NPs</b> | <b>3.44</b>                      | <b>0.095</b> | <b>9.78</b>                       | <b>154</b>   | <b>[2]</b>       |
| <b>HRP</b>                             | <b>10</b>                        | <b>0.43</b>  | <b>8.71</b>                       | <b>3.7</b>   | <b>[3]</b>       |
| <b>N-GODs</b>                          | <b>0.38</b>                      | <b>0.112</b> | <b>0.14</b>                       | <b>0.101</b> | <b>[4]</b>       |

**Table S1** The data of the colorimetric response patterns against AA at different concentrations using Cu-based nanozyme.

| AA concentration | $A_0-A$<br>Cu-based nanozyme |
|------------------|------------------------------|
| 1 $\mu$ M        | 0.713                        |
| 900nM            | 0.666                        |
| 800nM            | 0.625                        |
| 500nM            | 0.582                        |
| 400nM            | 0.544                        |
| 200nM            | 0.458                        |
| 100nM            | 0.445                        |
| 50nM             | 0.434                        |
| 10nM             | 0.417                        |



**Table S2** The data of the colorimetric response patterns against Cys at different concentrations using Cu-based nanozyme.

| Cys concentration | A <sub>0</sub> -A<br>Cu-based nanozyme |
|-------------------|----------------------------------------|
| 700nM             | 1.004                                  |
| 600nM             | 0.993                                  |
| 500nM             | 0.979                                  |
| 400nM             | 0.973                                  |
| 300nM             | 0.954                                  |
| 200nM             | 0.939                                  |
| 100nM             | 0.932                                  |
| 50nM              | 0.923                                  |
| 10nM              | 0.909                                  |

**Table S3** The data of the colorimetric response patterns against AA at different concentrations using Fe-based nanozyme.

| AA concentration | $A_0-A$<br>Fe-based nanozyme |
|------------------|------------------------------|
| 1 $\mu$ M        | 0.3628                       |
| 600nM            | 0.2298                       |
| 500nM            | 0.2204                       |
| 400nM            | 0.208                        |
| 10nM             | 0.0778                       |

**Table S4** The data of the colorimetric response patterns against GSH at different concentrations using Fe-based nanozyme.

| GSH concentration | A <sub>0</sub> -A<br>Fe-based nanozyme |
|-------------------|----------------------------------------|
| 1μM               | 0.3932                                 |
| 800nM             | 0.3622                                 |
| 700nM             | 0.3414                                 |
| 600nM             | 0.3282                                 |
| 400nM             | 0.2644                                 |
| 300nM             | 0.2506                                 |
| 200nM             | 0.2442                                 |
| 100nM             | 0.2252                                 |
| 50nM              | 0.2008                                 |
| 10nM              | 0.1856                                 |

**Table S5** data of the colorimetric response patterns against AA at different concentrations using Zn-based nanozyme.

| AA concentration | $A_0-A$<br>Zn-based nanozyme |
|------------------|------------------------------|
| 700nM            | 0.3948                       |
| 500nM            | 0.2742                       |
| 300nM            | 0.2516                       |
| 100nM            | 0.1408                       |
| 10nM             | 0.1174                       |

**Table S6** The data of the colorimetric response patterns against GSH at different concentrations using Zn-based nanozyme.

| GSH concentration | $A_0-A$<br>Zn-based nanozyme |
|-------------------|------------------------------|
| 900nM             | 0.2814                       |
| 700nM             | 0.2278                       |
| 500nM             | 0.1612                       |
| 300nM             | 0.1014                       |
| 100nM             | 0.0684                       |
| 10nM              | 0.0114                       |

**Table S7** The training matrix of the colorimetric response patterns against 7 antioxidants using Fe-based nanozyme, Co-based nanozyme sensor assay at the concentration of 50 $\mu$ M.

| Antioxidants | A <sub>0</sub> -A | A <sub>0</sub> -A |
|--------------|-------------------|-------------------|
|              | Fe-based nanozyme | Co-based nanozyme |
| GSH          | 0.507             | 0.788             |
| GSH          | 0.5               | 0.821             |
| GSH          | 0.5               | 0.862             |
| GSH          | 0.506             | 0.89              |
| GSH          | 0.517             | 0.912             |
| AA           | 0.807             | 0.891             |
| AA           | 0.804             | 0.908             |
| AA           | 0.799             | 0.938             |
| AA           | 0.8               | 0.959             |
| AA           | 0.817             | 0.974             |
| Cys          | 0.59              | 0.853             |
| Cys          | 0.584             | 0.887             |
| Cys          | 0.583             | 0.918             |
| Cys          | 0.592             | 0.941             |
| Cys          | 0.606             | 0.968             |
| TA           | 0.746             | 1.196             |
| TA           | 0.666             | 1.224             |
| TA           | 0.658             | 1.261             |
| TA           | 0.652             | 1.294             |
| TA           | 0.667             | 1.31              |
| C            | 0.398             | 0.385             |
| C            | 0.393             | 0.411             |
| C            | 0.391             | 0.443             |
| C            | 0.397             | 0.471             |
| C            | 0.408             | 0.49              |
| DA           | 0.357             | 0.37              |
| DA           | 0.354             | 0.407             |
| DA           | 0.355             | 0.45              |
| DA           | 0.358             | 0.474             |
| DA           | 0.372             | 0.491             |
| UA           | 0.321             | 0.296             |
| UA           | 0.307             | 0.345             |
| UA           | 0.309             | 0.387             |
| UA           | 0.317             | 0.416             |
| UA           | 0.326             | 0.435             |

**Table S8** The training matrix of the colorimetric response patterns against 7 antioxidants using Fe-based nanozyme, Co-based nanozyme sensor assay at the concentration of 1 $\mu$ M.

| Antioxidants | A <sub>0</sub> -A | A <sub>0</sub> -A |
|--------------|-------------------|-------------------|
|              | Fe-based nanozyme | Co-based nanozyme |
| GSH          | 0.419             | 0.679             |
| GSH          | 0.419             | 0.682             |
| GSH          | 0.434             | 0.676             |
| GSH          | 0.438             | 0.679             |
| GSH          | 0.438             | 0.677             |
| AA           | 0.472             | 0.296             |
| AA           | 0.468             | 0.298             |
| AA           | 0.472             | 0.297             |
| AA           | 0.474             | 0.3               |
| AA           | 0.481             | 0.301             |
| Cys          | 0.453             | 0.147             |
| Cys          | 0.45              | 0.148             |
| Cys          | 0.455             | 0.146             |
| Cys          | 0.461             | 0.149             |
| Cys          | 0.472             | 0.147             |
| TA           | 0.427             | 0.448             |
| TA           | 0.42              | 0.45              |
| TA           | 0.445             | 0.452             |
| TA           | 0.443             | 0.457             |
| TA           | 0.459             | 0.454             |
| C            | 0.459             | 0.388             |
| C            | 0.435             | 0.386             |
| C            | 0.43              | 0.382             |
| C            | 0.439             | 0.384             |
| C            | 0.449             | 0.377             |
| DA           | 0.276             | 0.334             |
| DA           | 0.29              | 0.352             |
| DA           | 0.269             | 0.351             |
| DA           | 0.286             | 0.36              |
| DA           | 0.283             | 0.354             |
| UA           | 0.347             | 0.312             |
| UA           | 0.272             | 0.317             |
| UA           | 0.279             | 0.314             |
| UA           | 0.294             | 0.319             |
| UA           | 0.294             | 0.316             |

**Table S9** The training matrix of the colorimetric response patterns against 7 antioxidants using Fe-based nanozyme, Co-based nanozyme sensor assay at the concentration of 100nM.

| Antioxidants | A <sub>0</sub> -A | A <sub>0</sub> -A |
|--------------|-------------------|-------------------|
|              | Fe-based nanozyme | Co-based nanozyme |
| GSH          | 0.413             | 0.382             |
| GSH          | 0.407             | 0.384             |
| GSH          | 0.411             | 0.381             |
| GSH          | 0.416             | 0.383             |
| GSH          | 0.424             | 0.381             |
| AA           | 0.387             | 0.263             |
| AA           | 0.386             | 0.264             |
| AA           | 0.377             | 0.262             |
| AA           | 0.395             | 0.263             |
| AA           | 0.409             | 0.263             |
| Cys          | 0.338             | 0.259             |
| Cys          | 0.327             | 0.26              |
| Cys          | 0.337             | 0.256             |
| Cys          | 0.352             | 0.259             |
| Cys          | 0.341             | 0.257             |
| TA           | 0.436             | 0.194             |
| TA           | 0.431             | 0.199             |
| TA           | 0.43              | 0.197             |
| TA           | 0.469             | 0.2               |
| TA           | 0.454             | 0.196             |
| C            | 0.253             | 0.216             |
| C            | 0.246             | 0.221             |
| C            | 0.25              | 0.221             |
| C            | 0.26              | 0.222             |
| C            | 0.276             | 0.219             |
| DA           | 0.311             | 0.158             |
| DA           | 0.305             | 0.163             |
| DA           | 0.309             | 0.169             |
| DA           | 0.321             | 0.175             |
| DA           | 0.334             | 0.177             |
| UA           | 0.203             | 0.198             |
| UA           | 0.182             | 0.198             |
| UA           | 0.207             | 0.196             |
| UA           | 0.201             | 0.203             |
| UA           | 0.21              | 0.2               |



**Table S10** The training matrix of the colorimetric response patterns against 7 antioxidants using Fe-based nanozyme, Co-based nanozyme sensor assay at the concentration of 10nM.

| Antioxidants | A <sub>0</sub> -A | A <sub>0</sub> -A |
|--------------|-------------------|-------------------|
|              | Fe-based nanozyme | Co-based nanozyme |
| GSH          | 0.338             | 0.357             |
| GSH          | 0.282             | 0.359             |
| GSH          | 0.253             | 0.362             |
| GSH          | 0.226             | 0.365             |
| GSH          | 0.219             | 0.363             |
| AA           | 0.366             | 0.29              |
| AA           | 0.349             | 0.291             |
| AA           | 0.342             | 0.287             |
| AA           | 0.327             | 0.289             |
| AA           | 0.327             | 0.286             |
| Cys          | 0.32              | 0.283             |
| Cys          | 0.306             | 0.285             |
| Cys          | 0.29              | 0.285             |
| Cys          | 0.286             | 0.29              |
| Cys          | 0.293             | 0.288             |
| TA           | 0.374             | 0.263             |
| TA           | 0.365             | 0.264             |
| TA           | 0.355             | 0.262             |
| TA           | 0.345             | 0.269             |
| TA           | 0.35              | 0.273             |
| C            | 0.361             | 0.075             |
| C            | 0.346             | 0.081             |
| C            | 0.333             | 0.086             |
| C            | 0.33              | 0.096             |
| C            | 0.32              | 0.086             |
| DA           | 0.303             | 0.067             |
| DA           | 0.293             | 0.071             |
| DA           | 0.293             | 0.072             |
| DA           | 0.298             | 0.08              |
| DA           | 0.307             | 0.079             |
| UA           | 0.55              | 0.058             |
| UA           | 0.543             | 0.066             |
| UA           | 0.542             | 0.069             |
| UA           | 0.548             | 0.076             |
| UA           | 0.556             | 0.077             |

**Table S11** The training matrix of the colorimetric response patterns against 7 antioxidants using Cu-based nanozyme, Co-based nanozyme sensor assay at the concentration of 50 $\mu$ M.

| Antioxidants | A <sub>0</sub> -A | A <sub>0</sub> -A |
|--------------|-------------------|-------------------|
|              | Cu-based nanozyme | Co-based nanozyme |
| GSH          | 0.841             | 0.357             |
| GSH          | 0.946             | 0.359             |
| GSH          | 1.004             | 0.362             |
| GSH          | 0.995             | 0.365             |
| GSH          | 1.007             | 0.363             |
| AA           | 1.517             | 0.29              |
| AA           | 1.619             | 0.291             |
| AA           | 1.674             | 0.287             |
| AA           | 1.691             | 0.289             |
| AA           | 1.703             | 0.286             |
| Cys          | 1.207             | 0.283             |
| Cys          | 1.311             | 0.285             |
| Cys          | 1.362             | 0.285             |
| Cys          | 1.371             | 0.29              |
| Cys          | 1.385             | 0.288             |
| TA           | 0.685             | 0.263             |
| TA           | 0.773             | 0.264             |
| TA           | 0.819             | 0.262             |
| TA           | 0.822             | 0.269             |
| TA           | 0.826             | 0.273             |
| C            | 0.336             | 0.075             |
| C            | 0.437             | 0.081             |
| C            | 0.49              | 0.086             |
| C            | 0.493             | 0.096             |
| C            | 0.501             | 0.086             |
| DA           | 0.376             | 0.067             |
| DA           | 0.472             | 0.071             |
| DA           | 0.532             | 0.072             |
| DA           | 0.549             | 0.08              |
| DA           | 0.528             | 0.079             |
| UA           | 1.117             | 0.058             |
| UA           | 1.219             | 0.066             |
| UA           | 1.279             | 0.069             |
| UA           | 1.294             | 0.076             |
| UA           | 1.309             | 0.077             |

**Table S12** The training matrix of the colorimetric response patterns against 7 antioxidants using Cu-based nanozyme, Co-based nanozyme sensor assay at the concentration of 1 $\mu$ M.

| Antioxidants | A <sub>0</sub> -A | A <sub>0</sub> -A |
|--------------|-------------------|-------------------|
|              | Cu-based nanozyme | Co-based nanozyme |
| GSH          | 0.62              | 0.679             |
| GSH          | 0.669             | 0.682             |
| GSH          | 0.714             | 0.676             |
| GSH          | 0.682             | 0.679             |
| GSH          | 0.748             | 0.677             |
| AA           | 0.508             | 0.296             |
| AA           | 0.591             | 0.298             |
| AA           | 0.605             | 0.297             |
| AA           | 0.637             | 0.3               |
| AA           | 0.649             | 0.301             |
| Cys          | 0.644             | 0.147             |
| Cys          | 0.715             | 0.148             |
| Cys          | 0.78              | 0.146             |
| Cys          | 0.831             | 0.149             |
| Cys          | 0.814             | 0.147             |
| TA           | 0.612             | 0.448             |
| TA           | 0.605             | 0.45              |
| TA           | 0.665             | 0.452             |
| TA           | 0.663             | 0.457             |
| TA           | 0.681             | 0.454             |
| C            | 0.44              | 0.388             |
| C            | 0.573             | 0.386             |
| C            | 0.732             | 0.382             |
| C            | 0.679             | 0.384             |
| C            | 0.601             | 0.377             |
| DA           | 0.291             | 0.334             |
| DA           | 0.406             | 0.352             |
| DA           | 0.465             | 0.351             |
| DA           | 0.476             | 0.36              |
| DA           | 0.489             | 0.354             |
| UA           | 0.413             | 0.312             |
| UA           | 0.492             | 0.317             |
| UA           | 0.59              | 0.314             |
| UA           | 0.606             | 0.319             |
| UA           | 0.622             | 0.316             |

**Table S13** The training matrix of the colorimetric response patterns against 7 antioxidants using Cu-based nanozyme, Co-based nanozyme sensor assay at the concentration of 100nM.

| Antioxidants | A <sub>0</sub> -A | A <sub>0</sub> -A |
|--------------|-------------------|-------------------|
|              | Cu-based nanozyme | Co-based nanozyme |
| GSH          | 1.177             | 0.823             |
| GSH          | 1.169             | 0.925             |
| GSH          | 1.164             | 0.984             |
| GSH          | 1.158             | 0.996             |
| GSH          | 1.156             | 1.014             |
| AA           | 1.405             | 0.704             |
| AA           | 1.39              | 0.805             |
| AA           | 1.382             | 0.865             |
| AA           | 1.375             | 0.876             |
| AA           | 1.373             | 0.896             |
| Cys          | 1.026             | 0.7               |
| Cys          | 1.012             | 0.801             |
| Cys          | 1.007             | 0.859             |
| Cys          | 0.997             | 0.872             |
| Cys          | 0.996             | 0.89              |
| TA           | 0.579             | 0.635             |
| TA           | 0.555             | 0.74              |
| TA           | 0.587             | 0.8               |
| TA           | 0.59              | 0.813             |
| TA           | 0.6               | 0.829             |
| C            | 0.989             | 0.657             |
| C            | 0.974             | 0.762             |
| C            | 0.97              | 0.824             |
| C            | 0.959             | 0.835             |
| C            | 0.961             | 0.852             |
| DA           | 0.184             | 0.599             |
| DA           | 0.181             | 0.704             |
| DA           | 0.168             | 0.772             |
| DA           | 0.157             | 0.788             |
| DA           | 0.157             | 0.81              |
| UA           | 0.995             | 0.982             |
| UA           | 0.987             | 1.09              |
| UA           | 0.979             | 1.142             |
| UA           | 0.969             | 1.146             |
| UA           | 0.974             | 1.166             |

**Table S14** The training matrix of the colorimetric response patterns against 7 antioxidants using Cu-based nanozyme, Co-based nanozyme sensor assay at the concentration of 10nM.

| Antioxidants | A <sub>0</sub> -A | A <sub>0</sub> -A |
|--------------|-------------------|-------------------|
|              | Cu-based nanozyme | Co-based nanozyme |
| GSH          | 0.841             | 0.357             |
| GSH          | 0.946             | 0.359             |
| GSH          | 1.004             | 0.362             |
| GSH          | 0.995             | 0.365             |
| GSH          | 1.007             | 0.363             |
| AA           | 1.517             | 0.29              |
| AA           | 1.619             | 0.291             |
| AA           | 1.674             | 0.287             |
| AA           | 1.691             | 0.289             |
| AA           | 1.703             | 0.286             |
| Cys          | 1.207             | 0.283             |
| Cys          | 1.311             | 0.285             |
| Cys          | 1.362             | 0.285             |
| Cys          | 1.371             | 0.29              |
| Cys          | 1.385             | 0.288             |
| TA           | 0.685             | 0.263             |
| TA           | 0.773             | 0.264             |
| TA           | 0.819             | 0.262             |
| TA           | 0.822             | 0.269             |
| TA           | 0.826             | 0.273             |
| C            | 0.336             | 0.075             |
| C            | 0.437             | 0.081             |
| C            | 0.49              | 0.086             |
| C            | 0.493             | 0.096             |
| C            | 0.501             | 0.086             |
| DA           | 0.376             | 0.067             |
| DA           | 0.472             | 0.071             |
| DA           | 0.532             | 0.072             |
| DA           | 0.549             | 0.08              |
| DA           | 0.528             | 0.079             |
| UA           | 1.117             | 0.058             |
| UA           | 1.219             | 0.066             |
| UA           | 1.279             | 0.069             |
| UA           | 1.294             | 0.076             |
| UA           | 1.309             | 0.077             |

**Table S15** The training matrix of the colorimetric response patterns against 7 antioxidants using Zn-based nanozyme, Co-based nanozyme sensor assay at the concentration of 50 $\mu$ M.

| Antioxidants | A <sub>0</sub> -A | A <sub>0</sub> -A |
|--------------|-------------------|-------------------|
|              | Cu-based nanozyme | Co-based nanozyme |
| GSH          | 0.564             | 0.788             |
| GSH          | 0.544             | 0.821             |
| GSH          | 0.556             | 0.862             |
| GSH          | 0.563             | 0.89              |
| GSH          | 0.577             | 0.912             |
| AA           | 0.737             | 0.891             |
| AA           | 0.748             | 0.908             |
| AA           | 0.766             | 0.938             |
| AA           | 0.777             | 0.959             |
| AA           | 0.796             | 0.974             |
| Cys          | 0.61              | 0.853             |
| Cys          | 0.579             | 0.887             |
| Cys          | 0.578             | 0.918             |
| Cys          | 0.59              | 0.941             |
| Cys          | 0.606             | 0.968             |
| TA           | 0.654             | 1.196             |
| TA           | 0.652             | 1.224             |
| TA           | 0.665             | 1.261             |
| TA           | 0.683             | 1.294             |
| TA           | 0.704             | 1.31              |
| C            | 0.483             | 0.385             |
| C            | 0.431             | 0.411             |
| C            | 0.438             | 0.443             |
| C            | 0.445             | 0.471             |
| C            | 0.46              | 0.49              |
| DA           | 0.335             | 0.37              |
| DA           | 0.338             | 0.407             |
| DA           | 0.351             | 0.45              |
| DA           | 0.356             | 0.474             |
| DA           | 0.369             | 0.491             |
| UA           | 0.22              | 0.296             |
| UA           | 0.215             | 0.345             |
| UA           | 0.229             | 0.387             |
| UA           | 0.239             | 0.416             |
| UA           | 0.255             | 0.435             |

**Table S16** The training matrix of the colorimetric response patterns against 7 antioxidants using Zn-based nanozyme, Co-based nanozyme sensor assay at the concentration of 1 $\mu$ M.

| Antioxidants | A <sub>0</sub> -A | A <sub>0</sub> -A |
|--------------|-------------------|-------------------|
|              | Cu-based nanozyme | Co-based nanozyme |
| GSH          | 0.166             | 0.679             |
| GSH          | 0.17              | 0.682             |
| GSH          | 0.179             | 0.676             |
| GSH          | 0.184             | 0.679             |
| GSH          | 0.193             | 0.677             |
| AA           | 0.235             | 0.296             |
| AA           | 0.238             | 0.298             |
| AA           | 0.253             | 0.297             |
| AA           | 0.257             | 0.3               |
| AA           | 0.269             | 0.301             |
| Cys          | 0.205             | 0.147             |
| Cys          | 0.205             | 0.148             |
| Cys          | 0.211             | 0.146             |
| Cys          | 0.218             | 0.149             |
| Cys          | 0.229             | 0.147             |
| TA           | 0.175             | 0.448             |
| TA           | 0.183             | 0.45              |
| TA           | 0.192             | 0.452             |
| TA           | 0.211             | 0.457             |
| TA           | 0.214             | 0.454             |
| C            | 0.091             | 0.388             |
| C            | 0.073             | 0.386             |
| C            | 0.078             | 0.382             |
| C            | 0.084             | 0.384             |
| C            | 0.096             | 0.377             |
| DA           | 0.165             | 0.334             |
| DA           | 0.178             | 0.352             |
| DA           | 0.186             | 0.351             |
| DA           | 0.198             | 0.36              |
| DA           | 0.205             | 0.354             |
| UA           | 0.213             | 0.312             |
| UA           | 0.236             | 0.317             |
| UA           | 0.246             | 0.314             |
| UA           | 0.255             | 0.319             |
| UA           | 0.267             | 0.316             |

**Table S17** The training matrix of the colorimetric response patterns against 7 antioxidants using Zn-based nanozyme, Co-based nanozyme sensor assay at the concentration of 100nM.

| Antioxidants | A <sub>0</sub> -A | A <sub>0</sub> -A |
|--------------|-------------------|-------------------|
|              | Cu-based nanozyme | Co-based nanozyme |
| GSH          | 0.361             | 0.251             |
| GSH          | 0.348             | 0.253             |
| GSH          | 0.358             | 0.253             |
| GSH          | 0.35              | 0.253             |
| GSH          | 0.352             | 0.254             |
| AA           | 0.182             | 0.132             |
| AA           | 0.175             | 0.133             |
| AA           | 0.183             | 0.134             |
| AA           | 0.173             | 0.133             |
| AA           | 0.182             | 0.136             |
| Cys          | 0.199             | 0.128             |
| Cys          | 0.193             | 0.129             |
| Cys          | 0.205             | 0.128             |
| Cys          | 0.193             | 0.129             |
| Cys          | 0.193             | 0.13              |
| TA           | 0.286             | 0.063             |
| TA           | 0.285             | 0.068             |
| TA           | 0.298             | 0.069             |
| TA           | 0.296             | 0.07              |
| TA           | 0.295             | 0.069             |
| C            | 0.239             | 0.085             |
| C            | 0.24              | 0.09              |
| C            | 0.242             | 0.093             |
| C            | 0.229             | 0.092             |
| C            | 0.23              | 0.092             |
| DA           | 0.175             | 0.027             |
| DA           | 0.183             | 0.032             |
| DA           | 0.185             | 0.041             |
| DA           | 0.179             | 0.045             |
| DA           | 0.159             | 0.05              |
| UA           | 0.244             | 0.067             |
| UA           | 0.241             | 0.067             |
| UA           | 0.243             | 0.068             |
| UA           | 0.231             | 0.073             |
| UA           | 0.225             | 0.073             |



**Table S18** The training matrix of the colorimetric response patterns against 7 antioxidants using Zn-based nanozyme, Co-based nanozyme sensor assay at the concentration of 10nM.

| Antioxidants | A <sub>0</sub> -A | A <sub>0</sub> -A |
|--------------|-------------------|-------------------|
|              | Cu-based nanozyme | Co-based nanozyme |
| GSH          | 0.148             | 0.357             |
| GSH          | 0.115             | 0.359             |
| GSH          | 0.043             | 0.362             |
| GSH          | 0.021             | 0.365             |
| GSH          | 0.029             | 0.363             |
| AA           | 0.219             | 0.29              |
| AA           | 0.184             | 0.291             |
| AA           | 0.159             | 0.287             |
| AA           | 0.16              | 0.289             |
| AA           | 0.147             | 0.286             |
| Cys          | 0.351             | 0.283             |
| Cys          | 0.236             | 0.285             |
| Cys          | 0.233             | 0.285             |
| Cys          | 0.221             | 0.29              |
| Cys          | 0.218             | 0.288             |
| TA           | 0.337             | 0.263             |
| TA           | 0.188             | 0.264             |
| TA           | 0.164             | 0.262             |
| TA           | 0.163             | 0.269             |
| TA           | 0.155             | 0.273             |
| C            | 0.239             | 0.075             |
| C            | 0.111             | 0.081             |
| C            | 0.098             | 0.086             |
| C            | 0.087             | 0.096             |
| C            | 0.088             | 0.086             |
| DA           | 0.165             | 0.067             |
| DA           | 0.099             | 0.071             |
| DA           | 0.095             | 0.072             |
| DA           | 0.088             | 0.08              |
| DA           | 0.085             | 0.079             |
| UA           | 0.298             | 0.058             |
| UA           | 0.155             | 0.066             |
| UA           | 0.149             | 0.069             |
| UA           | 0.144             | 0.076             |
| UA           | 0.141             | 0.077             |

**Table S19** The training matrix of the colorimetric response patterns against TA, UA binary mixture and TA, GSH, DA ternary mixture at 10 nM using Cu-based nanozyme, Co-based nanozyme assay.

| proportion of mixture | A <sub>0</sub> -A<br>Cu-based nanozyme | A <sub>0</sub> -A<br>Co-based nanozyme |
|-----------------------|----------------------------------------|----------------------------------------|
| TA:UA=9:1             | 1.427                                  | 1.158                                  |
| TA:UA=9:1             | 1.527                                  | 1.156                                  |
| TA:UA=9:1             | 1.586                                  | 1.153                                  |
| TA:UA=9:1             | 1.592                                  | 1.156                                  |
| TA:UA=9:1             | 1.609                                  | 1.152                                  |
| TA:UA=6:4             | 1.038                                  | 0.855                                  |
| TA:UA=6:4             | 1.137                                  | 0.851                                  |
| TA:UA=6:4             | 1.199                                  | 0.847                                  |
| TA:UA=6:4             | 1.191                                  | 0.849                                  |
| TA:UA=6:4             | 1.216                                  | 0.845                                  |
| TA:UA=5:5             | 1.263                                  | 0.806                                  |
| TA:UA=5:5             | 1.372                                  | 0.801                                  |
| TA:UA=5:5             | 1.436                                  | 0.796                                  |
| TA:UA=5:5             | 1.45                                   | 0.804                                  |
| TA:UA=5:5             | 1.469                                  | 0.798                                  |
| TA:UA=4:6             | 1.333                                  | 1.35                                   |
| TA:UA=4:6             | 1.426                                  | 1.352                                  |
| TA:UA=4:6             | 1.514                                  | 1.339                                  |
| TA:UA=4:6             | 1.515                                  | 1.339                                  |
| TA:UA=4:6             | 1.53                                   | 1.335                                  |
| TA:UA=1:9             | 1.286                                  | 0.772                                  |
| TA:UA=1:9             | 1.403                                  | 0.769                                  |
| TA:UA=1:9             | 1.452                                  | 0.767                                  |
| TA:UA=1:9             | 1.468                                  | 0.776                                  |
| TA:UA=1:9             | 1.483                                  | 0.769                                  |
| TA:GSH:DA=1:1:1       | 0.88                                   | 0.845                                  |
| TA:GSH:DA=1:1:1       | 0.856                                  | 0.841                                  |
| TA:GSH:DA=1:1:1       | 0.851                                  | 0.849                                  |
| TA:GSH:DA=1:1:1       | 0.847                                  | 0.845                                  |
| TA:GSH:DA=1:1:1       | 0.847                                  | 0.839                                  |
| TA:GSH:DA=1:2:1       | 0.868                                  | 0.883                                  |
| TA:GSH:DA=1:2:1       | 0.85                                   | 0.885                                  |
| TA:GSH:DA=1:2:1       | 0.873                                  | 0.873                                  |
| TA:GSH:DA=1:2:1       | 0.86                                   | 0.873                                  |
| TA:GSH:DA=1:2:1       | 0.865                                  | 0.867                                  |
| TA:GSH:DA=1:2:3       | 0.973                                  | 0.808                                  |
| TA:GSH:DA=1:2:3       | 0.943                                  | 0.803                                  |
| TA:GSH:DA=1:2:3       | 0.955                                  | 0.806                                  |
| TA:GSH:DA=1:2:3       | 0.949                                  | 0.805                                  |

---

|                 |       |       |
|-----------------|-------|-------|
| TA:GSH:DA=1:2:3 | 0.949 | 0.799 |
| TA:GSH:DA=2:1:1 | 0.674 | 0.89  |
| TA:GSH:DA=2:1:1 | 0.66  | 0.888 |
| TA:GSH:DA=2:1:1 | 0.658 | 0.884 |
| TA:GSH:DA=2:1:1 | 0.666 | 0.887 |
| TA:GSH:DA=2:1:1 | 0.667 | 0.885 |
| TA:GSH:DA=2:2:1 | 1.012 | 0.881 |
| TA:GSH:DA=2:2:1 | 0.995 | 0.885 |
| TA:GSH:DA=2:2:1 | 0.993 | 0.88  |
| TA:GSH:DA=2:2:1 | 0.989 | 0.877 |
| TA:GSH:DA=2:2:1 | 0.988 | 0.873 |
| TA:GSH:DA=2:3:1 | 0.743 | 0.749 |
| TA:GSH:DA=2:3:1 | 0.739 | 0.752 |
| TA:GSH:DA=2:3:1 | 0.741 | 0.749 |
| TA:GSH:DA=2:3:1 | 0.74  | 0.753 |
| TA:GSH:DA=2:3:1 | 0.74  | 0.748 |
| TA:GSH:DA=3:1:2 | 0.701 | 0.914 |
| TA:GSH:DA=3:1:2 | 0.688 | 0.915 |
| TA:GSH:DA=3:1:2 | 0.685 | 0.913 |
| TA:GSH:DA=3:1:2 | 0.684 | 0.915 |
| TA:GSH:DA=3:1:2 | 0.687 | 0.915 |
| TA:GSH:DA=3:2:1 | 0.919 | 0.846 |
| TA:GSH:DA=3:2:1 | 0.91  | 0.852 |
| TA:GSH:DA=3:2:1 | 0.919 | 0.849 |
| TA:GSH:DA=3:2:1 | 0.917 | 0.848 |
| TA:GSH:DA=3:2:1 | 0.919 | 0.844 |
| TA:GSH:DA=3:1:1 | 0.688 | 0.518 |
| TA:GSH:DA=3:1:1 | 0.667 | 0.528 |
| TA:GSH:DA=3:1:1 | 0.667 | 0.525 |
| TA:GSH:DA=3:1:1 | 0.664 | 0.521 |
| TA:GSH:DA=3:1:1 | 0.667 | 0.516 |

---

**Table S20** The training matrix of the colorimetric response patterns against AA, DA binary mixture and AA, Cys, UA ternary mixture at 10 nM using Fe-based nanozyme, Co-based nanozyme assay.

| proportion of mixture | A <sub>0</sub> -A<br>Fe-based nanozyme | A <sub>0</sub> -A<br>Co-based nanozyme |
|-----------------------|----------------------------------------|----------------------------------------|
| AA:DA=2:8             | 0.454                                  | 1.135                                  |
| AA:DA=2:8             | 0.444                                  | 1.129                                  |
| AA:DA=2:8             | 0.44                                   | 1.131                                  |
| AA:DA=2:8             | 0.437                                  | 1.134                                  |
| AA:DA=2:8             | 0.451                                  | 1.125                                  |
| AA:DA=4:6             | 0.48                                   | 0.981                                  |
| AA:DA=4:6             | 0.475                                  | 0.982                                  |
| AA:DA=4:6             | 0.467                                  | 0.98                                   |
| AA:DA=4:6             | 0.468                                  | 0.982                                  |
| AA:DA=4:6             | 0.478                                  | 0.978                                  |
| AA:DA=5:5             | 0.425                                  | 1.061                                  |
| AA:DA=5:5             | 0.416                                  | 1.041                                  |
| AA:DA=5:5             | 0.418                                  | 1.056                                  |
| AA:DA=5:5             | 0.423                                  | 1.046                                  |
| AA:DA=5:5             | 0.435                                  | 1.044                                  |
| AA:DA=6:4             | 0.456                                  | 1.009                                  |
| AA:DA=6:4             | 0.444                                  | 1.019                                  |
| AA:DA=6:4             | 0.448                                  | 1.02                                   |
| AA:DA=6:4             | 0.454                                  | 1.021                                  |
| AA:DA=6:4             | 0.466                                  | 1.02                                   |
| AA:DA=8:2             | 0.497                                  | 0.979                                  |
| AA:DA=8:2             | 0.496                                  | 0.981                                  |
| AA:DA=8:2             | 0.5                                    | 0.979                                  |
| AA:DA=8:2             | 0.499                                  | 0.98                                   |
| AA:DA=8:2             | 0.515                                  | 0.978                                  |
| AA:Cys:UA=1:2:3       | 0.485                                  | 1.153                                  |
| AA:Cys:UA=1:2:3       | 0.473                                  | 1.154                                  |
| AA:Cys:UA=1:2:3       | 0.477                                  | 1.148                                  |
| AA:Cys:UA=1:2:3       | 0.481                                  | 1.151                                  |
| AA:Cys:UA=1:2:3       | 0.491                                  | 1.147                                  |
| AA:Cys:UA=2:1:1       | 0.432                                  | 0.717                                  |
| AA:Cys:UA=2:1:1       | 0.425                                  | 0.722                                  |
| AA:Cys:UA=2:1:1       | 0.429                                  | 0.723                                  |
| AA:Cys:UA=2:1:1       | 0.434                                  | 0.726                                  |
| AA:Cys:UA=2:1:1       | 0.445                                  | 0.724                                  |
| AA:Cys:UA=2:2:1       | 0.449                                  | 0.951                                  |
| AA:Cys:UA=2:2:1       | 0.442                                  | 0.951                                  |
| AA:Cys:UA=2:2:1       | 0.442                                  | 0.951                                  |
| AA:Cys:UA=2:2:1       | 0.447                                  | 0.954                                  |

---

|                 |       |       |
|-----------------|-------|-------|
| AA:Cys:UA=2:2:1 | 0.456 | 0.949 |
| AA:Cys:UA=2:3:1 | 0.486 | 0.897 |
| AA:Cys:UA=2:3:1 | 0.48  | 0.894 |
| AA:Cys:UA=2:3:1 | 0.475 | 0.889 |
| AA:Cys:UA=2:3:1 | 0.475 | 0.891 |
| AA:Cys:UA=2:3:1 | 0.486 | 0.885 |
| AA:Cys:UA=3:1:2 | 0.464 | 0.849 |
| AA:Cys:UA=3:1:2 | 0.457 | 0.867 |
| AA:Cys:UA=3:1:2 | 0.457 | 0.864 |
| AA:Cys:UA=3:1:2 | 0.462 | 0.86  |
| AA:Cys:UA=3:1:2 | 0.474 | 0.854 |
| AA:Cys:UA=3:2:1 | 0.488 | 0.613 |
| AA:Cys:UA=3:2:1 | 0.483 | 0.609 |
| AA:Cys:UA=3:2:1 | 0.479 | 0.609 |
| AA:Cys:UA=3:2:1 | 0.482 | 0.613 |
| AA:Cys:UA=3:2:1 | 0.494 | 0.607 |
| AA:Cys:UA=3:1:1 | 0.554 | 0.633 |
| AA:Cys:UA=3:1:1 | 0.544 | 0.637 |
| AA:Cys:UA=3:1:1 | 0.546 | 0.632 |
| AA:Cys:UA=3:1:1 | 0.548 | 0.633 |
| AA:Cys:UA=3:1:1 | 0.554 | 0.63  |

---

**Table S21** The training matrix of the colorimetric response patterns against GSH, Cys binary mixture and GSH, AA, TA ternary mixture at 10 nM using Zn-based nanozyme, Co-based nanozyme assay.

| proportion of mixture | A <sub>0</sub> -A<br>Zn-based nanozyme | A <sub>0</sub> -A<br>Co-based nanozyme |
|-----------------------|----------------------------------------|----------------------------------------|
| GSH:Cys=9:1           | 0.213                                  | 0.586                                  |
| GSH:Cys=9:1           | 0.205                                  | 0.57                                   |
| GSH:Cys=9:1           | 0.223                                  | 0.577                                  |
| GSH:Cys=9:1           | 0.22                                   | 0.576                                  |
| GSH:Cys=9:1           | 0.217                                  | 0.569                                  |
| GSH:Cys=8:2           | 0.259                                  | 1.254                                  |
| GSH:Cys=8:2           | 0.256                                  | 1.242                                  |
| GSH:Cys=8:2           | 0.278                                  | 1.248                                  |
| GSH:Cys=8:2           | 0.276                                  | 1.25                                   |
| GSH:Cys=8:2           | 0.277                                  | 1.25                                   |
| GSH:Cys=7:3           | 0.34                                   | 0.19                                   |
| GSH:Cys=7:3           | 0.334                                  | 0.201                                  |
| GSH:Cys=7:3           | 0.351                                  | 0.186                                  |
| GSH:Cys=7:3           | 0.35                                   | 0.194                                  |
| GSH:Cys=7:3           | 0.345                                  | 0.193                                  |
| GSH:Cys=6:4           | 0.4                                    | 0.402                                  |
| GSH:Cys=6:4           | 0.392                                  | 0.392                                  |
| GSH:Cys=6:4           | 0.404                                  | 0.391                                  |
| GSH:Cys=6:4           | 0.408                                  | 0.387                                  |
| GSH:Cys=6:4           | 0.411                                  | 0.394                                  |
| GSH:Cys=5:5           | 0.409                                  | 0.549                                  |
| GSH:Cys=5:5           | 0.4                                    | 0.542                                  |
| GSH:Cys=5:5           | 0.414                                  | 0.544                                  |
| GSH:Cys=5:5           | 0.416                                  | 0.536                                  |
| GSH:Cys=5:5           | 0.416                                  | 0.53                                   |
| GSH:Cys=4:6           | 0.253                                  | 0.498                                  |
| GSH:Cys=4:6           | 0.246                                  | 0.487                                  |
| GSH:Cys=4:6           | 0.262                                  | 0.475                                  |
| GSH:Cys=4:6           | 0.264                                  | 0.487                                  |
| GSH:Cys=4:6           | 0.266                                  | 0.48                                   |
| GSH:Cys=3:7           | 0.316                                  | 0.602                                  |
| GSH:Cys=3:7           | 0.309                                  | 0.587                                  |
| GSH:Cys=3:7           | 0.314                                  | 0.596                                  |
| GSH:Cys=3:7           | 0.312                                  | 0.579                                  |
| GSH:Cys=3:7           | 0.328                                  | 0.576                                  |
| GSH:Cys=2:8           | 0.527                                  | 0.245                                  |
| GSH:Cys=2:8           | 0.517                                  | 0.253                                  |
| GSH:Cys=2:8           | 0.534                                  | 0.249                                  |
| GSH:Cys=2:8           | 0.532                                  | 0.252                                  |

---

|                 |       |       |
|-----------------|-------|-------|
| GSH:Cys=2:8     | 0.531 | 0.256 |
| GSH:Cys=1:9     | 0.543 | 0.486 |
| GSH:Cys=1:9     | 0.531 | 0.479 |
| GSH:Cys=1:9     | 0.551 | 0.479 |
| GSH:Cys=1:9     | 0.545 | 0.482 |
| GSH:Cys=1:9     | 0.548 | 0.48  |
| GSH:AA:TA=1:1:1 | 0.224 | 0.247 |
| GSH:AA:TA=1:1:1 | 0.212 | 0.24  |
| GSH:AA:TA=1:1:1 | 0.223 | 0.245 |
| GSH:AA:TA=1:1:1 | 0.22  | 0.251 |
| GSH:AA:TA=1:1:1 | 0.22  | 0.166 |
| GSH:AA:TA=2:1:1 | 0.272 | 0.155 |
| GSH:AA:TA=2:1:1 | 0.278 | 0.162 |
| GSH:AA:TA=2:1:1 | 0.29  | 0.164 |
| GSH:AA:TA=2:1:1 | 0.289 | 0.169 |
| GSH:AA:TA=2:1:1 | 0.289 | 0.166 |
| GSH:AA:TA=1:2:1 | 0.302 | 0.116 |
| GSH:AA:TA=1:2:1 | 0.296 | 0.113 |
| GSH:AA:TA=1:2:1 | 0.313 | 0.119 |
| GSH:AA:TA=1:2:1 | 0.309 | 0.122 |
| GSH:AA:TA=1:2:1 | 0.31  | 0.128 |
| GSH:AA:TA=3:2:1 | 0.399 | 0.085 |
| GSH:AA:TA=3:2:1 | 0.398 | 0.084 |
| GSH:AA:TA=3:2:1 | 0.416 | 0.085 |
| GSH:AA:TA=3:2:1 | 0.413 | 0.092 |
| GSH:AA:TA=3:2:1 | 0.412 | 0.097 |
| GSH:AA:TA=1:2:3 | 0.343 | 0.046 |
| GSH:AA:TA=1:2:3 | 0.334 | 0.044 |
| GSH:AA:TA=1:2:3 | 0.35  | 0.053 |
| GSH:AA:TA=1:2:3 | 0.339 | 0.073 |
| GSH:AA:TA=1:2:3 | 0.351 | 0.052 |

---

**Table S22** The training matrix of the colorimetric response patterns against the the antioxidants at 10 nM and other interfering species at 1 $\mu$ M using Cu-based nanozyme, Co-based nanozyme sensor assay.

| Antioxidants and interfering species | A <sub>0</sub> -A<br>Cu-based nanozyme | A <sub>0</sub> -A<br>Co-based nanozyme |
|--------------------------------------|----------------------------------------|----------------------------------------|
| GSH                                  | 0.841                                  | 0.357                                  |
| GSH                                  | 0.946                                  | 0.359                                  |
| GSH                                  | 1.004                                  | 0.362                                  |
| GSH                                  | 0.995                                  | 0.365                                  |
| GSH                                  | 1.007                                  | 0.363                                  |
| AA                                   | 1.517                                  | 0.29                                   |
| AA                                   | 1.619                                  | 0.291                                  |
| AA                                   | 1.674                                  | 0.287                                  |
| AA                                   | 1.691                                  | 0.289                                  |
| AA                                   | 1.703                                  | 0.286                                  |
| Cys                                  | 1.207                                  | 0.283                                  |
| Cys                                  | 1.311                                  | 0.285                                  |
| Cys                                  | 1.362                                  | 0.285                                  |
| Cys                                  | 1.371                                  | 0.29                                   |
| Cys                                  | 1.385                                  | 0.288                                  |
| TA                                   | 0.685                                  | 0.263                                  |
| TA                                   | 0.773                                  | 0.264                                  |
| TA                                   | 0.819                                  | 0.262                                  |
| TA                                   | 0.822                                  | 0.269                                  |
| TA                                   | 0.826                                  | 0.273                                  |
| C                                    | 0.336                                  | 0.075                                  |
| C                                    | 0.437                                  | 0.081                                  |
| C                                    | 0.49                                   | 0.086                                  |
| C                                    | 0.493                                  | 0.096                                  |
| C                                    | 0.501                                  | 0.086                                  |
| DA                                   | 0.376                                  | 0.067                                  |
| DA                                   | 0.472                                  | 0.071                                  |
| DA                                   | 0.532                                  | 0.072                                  |
| DA                                   | 0.549                                  | 0.08                                   |
| DA                                   | 0.528                                  | 0.079                                  |
| UA                                   | 1.117                                  | 0.058                                  |
| UA                                   | 1.219                                  | 0.066                                  |
| UA                                   | 1.279                                  | 0.069                                  |
| UA                                   | 1.294                                  | 0.076                                  |
| UA                                   | 1.309                                  | 0.077                                  |
| CA                                   | 0.932                                  | 0.478                                  |
| CA                                   | 1.029                                  | 0.505                                  |
| CA                                   | 1.098                                  | 0.546                                  |



---

|     |       |       |
|-----|-------|-------|
| CA  | 1.109 | 0.573 |
| CA  | 1.118 | 0.594 |
| GA  | 0.874 | 0.347 |
| GA  | 0.976 | 0.376 |
| GA  | 1.047 | 0.41  |
| GA  | 1.065 | 0.436 |
| GA  | 1.076 | 0.456 |
| TAA | 0.834 | 0.776 |
| TAA | 0.943 | 0.807 |
| TAA | 1.001 | 0.845 |
| TAA | 1.013 | 0.869 |
| TAA | 1.032 | 0.888 |

---

**Table S23** The training matrix of the colorimetric response patterns against the the antioxidants at 10 nM and other interfering species at 1 $\mu$ M using Fe-based nanozyme, Co-based nanozyme sensor assay.

| Antioxidants and interfering species | A <sub>0</sub> -A<br>Fe-based nanozyme | A <sub>0</sub> -A<br>Co-based nanozyme |
|--------------------------------------|----------------------------------------|----------------------------------------|
| GSH                                  | 0.338                                  | 0.357                                  |
| GSH                                  | 0.282                                  | 0.359                                  |
| GSH                                  | 0.253                                  | 0.362                                  |
| GSH                                  | 0.226                                  | 0.365                                  |
| GSH                                  | 0.219                                  | 0.363                                  |
| AA                                   | 0.366                                  | 0.29                                   |
| AA                                   | 0.349                                  | 0.291                                  |
| AA                                   | 0.342                                  | 0.287                                  |
| AA                                   | 0.327                                  | 0.289                                  |
| AA                                   | 0.327                                  | 0.286                                  |
| Cys                                  | 0.32                                   | 0.283                                  |
| Cys                                  | 0.306                                  | 0.285                                  |
| Cys                                  | 0.29                                   | 0.285                                  |
| Cys                                  | 0.286                                  | 0.29                                   |
| Cys                                  | 0.293                                  | 0.288                                  |
| TA                                   | 0.374                                  | 0.263                                  |
| TA                                   | 0.365                                  | 0.264                                  |
| TA                                   | 0.355                                  | 0.262                                  |
| TA                                   | 0.345                                  | 0.269                                  |
| TA                                   | 0.35                                   | 0.273                                  |
| C                                    | 0.361                                  | 0.075                                  |
| C                                    | 0.346                                  | 0.081                                  |
| C                                    | 0.333                                  | 0.086                                  |
| C                                    | 0.33                                   | 0.096                                  |
| C                                    | 0.32                                   | 0.086                                  |
| DA                                   | 0.303                                  | 0.067                                  |
| DA                                   | 0.293                                  | 0.071                                  |
| DA                                   | 0.293                                  | 0.072                                  |
| DA                                   | 0.298                                  | 0.08                                   |
| DA                                   | 0.307                                  | 0.079                                  |
| UA                                   | 0.55                                   | 0.058                                  |
| UA                                   | 0.543                                  | 0.066                                  |
| UA                                   | 0.542                                  | 0.069                                  |
| UA                                   | 0.548                                  | 0.076                                  |
| UA                                   | 0.556                                  | 0.077                                  |
| TAA                                  | 0.157                                  | 0.549                                  |
| TAA                                  | 0.148                                  | 0.549                                  |
| TAA                                  | 0.143                                  | 0.543                                  |

---

|     |       |       |
|-----|-------|-------|
| TAA | 0.153 | 0.545 |
| TAA | 0.161 | 0.542 |
| MT  | 0.301 | 0.978 |
| MT  | 0.29  | 0.98  |
| MT  | 0.289 | 0.978 |
| MT  | 0.299 | 0.978 |
| MT  | 0.308 | 0.974 |
| MO  | 0.241 | 0.732 |
| MO  | 0.231 | 0.734 |
| MO  | 0.229 | 0.731 |
| MO  | 0.235 | 0.727 |
| MO  | 0.244 | 0.724 |

---

**Table S24** The training matrix of the colorimetric response patterns against the the antioxidants at 10 nM and other interfering species at 1 $\mu$ M using Zn-based nanozyme, Co-based nanozyme sensor assay.

| Antioxidants and interfering species | A <sub>0</sub> -A<br>Zn-based nanozyme | A <sub>0</sub> -A<br>Co-based nanozyme |
|--------------------------------------|----------------------------------------|----------------------------------------|
| GSH                                  | 0.294                                  | 0.357                                  |
| GSH                                  | 0.281                                  | 0.359                                  |
| GSH                                  | 0.29                                   | 0.362                                  |
| GSH                                  | 0.282                                  | 0.365                                  |
| GSH                                  | 0.282                                  | 0.363                                  |
| AA                                   | 0.409                                  | 0.29                                   |
| AA                                   | 0.399                                  | 0.291                                  |
| AA                                   | 0.403                                  | 0.287                                  |
| AA                                   | 0.396                                  | 0.289                                  |
| AA                                   | 0.402                                  | 0.286                                  |
| Cys                                  | 0.301                                  | 0.283                                  |
| Cys                                  | 0.287                                  | 0.285                                  |
| Cys                                  | 0.309                                  | 0.285                                  |
| Cys                                  | 0.292                                  | 0.29                                   |
| Cys                                  | 0.303                                  | 0.288                                  |
| TA                                   | 0.274                                  | 0.263                                  |
| TA                                   | 0.265                                  | 0.264                                  |
| TA                                   | 0.275                                  | 0.262                                  |
| TA                                   | 0.267                                  | 0.269                                  |
| TA                                   | 0.271                                  | 0.273                                  |
| C                                    | 0.372                                  | 0.075                                  |
| C                                    | 0.366                                  | 0.081                                  |
| C                                    | 0.375                                  | 0.086                                  |
| C                                    | 0.367                                  | 0.096                                  |
| C                                    | 0.357                                  | 0.086                                  |
| DA                                   | 0.345                                  | 0.067                                  |
| DA                                   | 0.338                                  | 0.071                                  |
| DA                                   | 0.347                                  | 0.072                                  |
| DA                                   | 0.337                                  | 0.08                                   |
| DA                                   | 0.343                                  | 0.079                                  |
| UA                                   | 0.437                                  | 0.058                                  |
| UA                                   | 0.428                                  | 0.066                                  |
| UA                                   | 0.427                                  | 0.069                                  |
| UA                                   | 0.416                                  | 0.076                                  |
| UA                                   | 0.411                                  | 0.077                                  |
| CA                                   | 0.409                                  | 0.594                                  |
| CA                                   | 0.396                                  | 0.598                                  |
| CA                                   | 0.413                                  | 0.601                                  |

---

|    |       |       |
|----|-------|-------|
| CA | 0.405 | 0.601 |
| CA | 0.407 | 0.602 |
| GA | 0.425 | 0.549 |
| GA | 0.417 | 0.547 |
| GA | 0.429 | 0.551 |
| GA | 0.426 | 0.552 |
| GA | 0.43  | 0.553 |
| MT | 0.38  | 0.418 |
| MT | 0.373 | 0.418 |
| MT | 0.391 | 0.415 |
| MT | 0.382 | 0.415 |
| MT | 0.382 | 0.415 |

---

**Table S25** The training matrix of the colorimetric response patterns against the antioxidants at 10 nM in serum samples using Cu-based nanozyme, Co-based nanozyme sensor assay.

| Antioxidants | A <sub>0</sub> -A | A <sub>0</sub> -A |
|--------------|-------------------|-------------------|
|              | Cu-based nanozyme | Co-based nanozyme |
| GSH          | 0.109             | 0.188             |
| GSH          | 0.119             | 0.182             |
| GSH          | 0.122             | 0.167             |
| GSH          | 0.117             | 0.175             |
| GSH          | 0.107             | 0.183             |
| AA           | 0.054             | 0.249             |
| AA           | 0.059             | 0.257             |
| AA           | 0.071             | 0.245             |
| AA           | 0.069             | 0.244             |
| AA           | 0.061             | 0.248             |
| Cys          | 0.186             | 0.202             |
| Cys          | 0.194             | 0.197             |
| Cys          | 0.197             | 0.189             |
| Cys          | 0.194             | 0.196             |
| Cys          | 0.189             | 0.201             |
| TA           | 0.324             | 0.178             |
| TA           | 0.326             | 0.173             |
| TA           | 0.326             | 0.168             |
| TA           | 0.323             | 0.177             |
| TA           | 0.32              | 0.182             |
| C            | 0.096             | 0.239             |
| C            | 0.1               | 0.244             |
| C            | 0.103             | 0.234             |
| C            | 0.102             | 0.24              |
| C            | 0.095             | 0.246             |
| DA           | 0.166             | 0.148             |
| DA           | 0.171             | 0.146             |
| DA           | 0.173             | 0.134             |
| DA           | 0.172             | 0.137             |
| DA           | 0.168             | 0.142             |
| UA           | 0.159             | 0.139             |
| UA           | 0.16              | 0.131             |
| UA           | 0.157             | 0.122             |
| UA           | 0.153             | 0.129             |
| UA           | 0.149             | 0.132             |

**Table S26** The training matrix of the colorimetric response patterns against the antioxidants at 10 nM in serum samples using Fe-based nanozyme, Co-based nanozyme sensor assay.

| Antioxidants | A <sub>0</sub> -A | A <sub>0</sub> -A |
|--------------|-------------------|-------------------|
|              | Fe-based nanozyme | Co-based nanozyme |
| GSH          | 0.227             | 0.188             |
| GSH          | 0.225             | 0.182             |
| GSH          | 0.229             | 0.167             |
| GSH          | 0.23              | 0.175             |
| GSH          | 0.227             | 0.183             |
| AA           | 0.287             | 0.249             |
| AA           | 0.285             | 0.257             |
| AA           | 0.284             | 0.245             |
| AA           | 0.284             | 0.244             |
| AA           | 0.279             | 0.248             |
| Cys          | 0.268             | 0.202             |
| Cys          | 0.266             | 0.197             |
| Cys          | 0.267             | 0.189             |
| Cys          | 0.268             | 0.196             |
| Cys          | 0.268             | 0.201             |
| TA           | 0.343             | 0.178             |
| TA           | 0.344             | 0.173             |
| TA           | 0.346             | 0.168             |
| TA           | 0.346             | 0.177             |
| TA           | 0.342             | 0.182             |
| C            | 0.041             | 0.239             |
| C            | 0.04              | 0.244             |
| C            | 0.044             | 0.234             |
| C            | 0.047             | 0.24              |
| C            | 0.04              | 0.246             |
| DA           | 0.285             | 0.148             |
| DA           | 0.285             | 0.146             |
| DA           | 0.291             | 0.134             |
| DA           | 0.286             | 0.137             |
| DA           | 0.285             | 0.142             |
| UA           | 0.341             | 0.139             |
| UA           | 0.341             | 0.131             |
| UA           | 0.341             | 0.122             |
| UA           | 0.344             | 0.129             |
| UA           | 0.331             | 0.132             |

**Table S27** The training matrix of the colorimetric response patterns against the antioxidants at 10 nM in serum samples using Zn-based nanozyme, Co-based nanozyme sensor assay.

| Antioxidants | A <sub>0</sub> -A<br>Zn-based nanozyme | A <sub>0</sub> -A<br>Co-based nanozyme |
|--------------|----------------------------------------|----------------------------------------|
| GSH          | 0.143                                  | 0.188                                  |
| GSH          | 0.145                                  | 0.182                                  |
| GSH          | 0.144                                  | 0.167                                  |
| GSH          | 0.14                                   | 0.175                                  |
| GSH          | 0.136                                  | 0.183                                  |
| AA           | 0.083                                  | 0.249                                  |
| AA           | 0.081                                  | 0.257                                  |
| AA           | 0.086                                  | 0.245                                  |
| AA           | 0.09                                   | 0.244                                  |
| AA           | 0.086                                  | 0.248                                  |
| Cys          | 0.206                                  | 0.202                                  |
| Cys          | 0.205                                  | 0.197                                  |
| Cys          | 0.219                                  | 0.189                                  |
| Cys          | 0.209                                  | 0.196                                  |
| Cys          | 0.203                                  | 0.201                                  |
| TA           | 0.244                                  | 0.178                                  |
| TA           | 0.24                                   | 0.173                                  |
| TA           | 0.24                                   | 0.168                                  |
| TA           | 0.238                                  | 0.177                                  |
| TA           | 0.245                                  | 0.182                                  |
| C            | 0.114                                  | 0.239                                  |
| C            | 0.113                                  | 0.244                                  |
| C            | 0.119                                  | 0.234                                  |
| C            | 0.107                                  | 0.24                                   |
| C            | 0.116                                  | 0.246                                  |
| DA           | 0.146                                  | 0.148                                  |
| DA           | 0.143                                  | 0.146                                  |
| DA           | 0.144                                  | 0.134                                  |
| DA           | 0.136                                  | 0.137                                  |
| DA           | 0.152                                  | 0.142                                  |
| UA           | 0.205                                  | 0.139                                  |
| UA           | 0.206                                  | 0.131                                  |
| UA           | 0.216                                  | 0.122                                  |
| UA           | 0.205                                  | 0.129                                  |
| UA           | 0.212                                  | 0.132                                  |



## References

- [1] Liu C, Cai Y, Wang J, Liu X, Ren H, Yan L, et al. Facile Preparation of Homogeneous Copper Nanoclusters Exhibiting Excellent Tetraenzyme Mimetic Activities for Colorimetric Glutathione Sensing and Fluorimetric Ascorbic Acid Sensing. *ACS Appl Mater Interfaces*. 2020; 12: 42521-42530.
- [2] Gao L, Zhuang J, Nie L, Zhang J, Zhang Y, N. Gu, T. Wang, J. Feng, D. Yang, S. Perrett, X. Yan, Intrinsic peroxidase-like activity of ferromagnetic nanoparticles. *Nat. Nanotechnol*. 2007; 2: 577–583.
- [3] Gao L, Zhuang J, Nie L, Zhang J, Zhang Y, et al. Intrinsic peroxidase-like activity of ferromagnetic nanoparticles. *Nat Nanotechnol*. 2007; 2: 577-583.
- [4] Zhang X, Gao Y. 2D/2D h-BN/N-doped MoS<sub>2</sub> Hetero-structure Catalyst with Enhanced Peroxidase-like Performance for Visual Colorimetric Determination of H<sub>2</sub>O<sub>2</sub>. *Chem. Asian J*. 2020; 15: 1315–1323.
